# Supplementary figures and images for: IDEA: Integrated Drug Expression Analysis—Integration of Gene Expression and Clinical Data for the Identification of Therapeutic Candidates
Source: PubMed Central journal article supplement — CPT Pharmacometrics Syst Pharmacol. 2015 Jun 18;4(7):415–25. doi: 10.1002/psp4.51 (PMC4544055; doi:10.1002/psp4.51), 2015-06-18

A.

## Paclitaxel (Curtis)

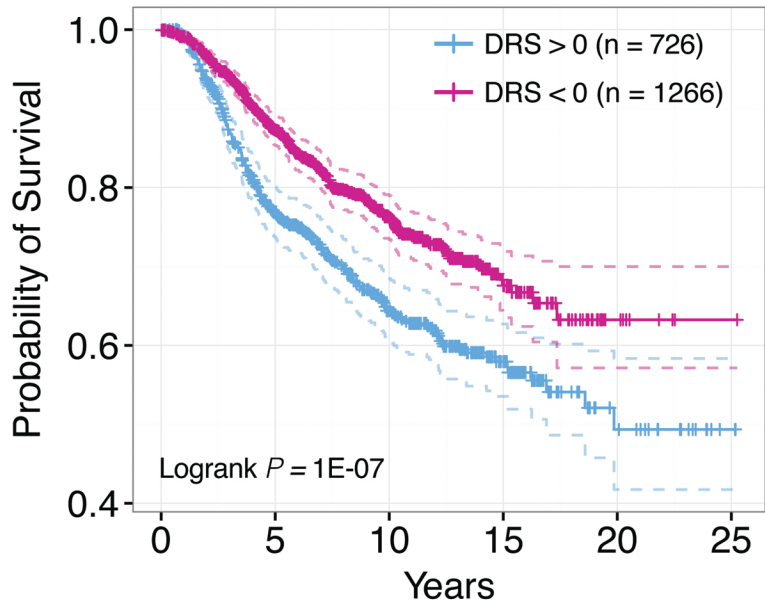

B.

## Paclitaxel (Hatzis)

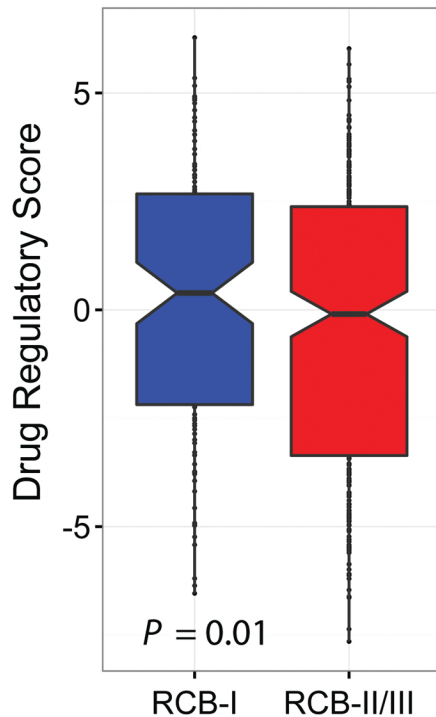

Supplement: psp40004-0415-sd2.pdf [file psp40004-0415-sd2.pdf]
